# Supplementary material
Source: HighWire-hosted journal article supplement (https://cmaj.ca/highwire/filestream/74666/field_highwire_adjunct_files/6/190385-res-6-at.pdf)
Supplement: 190385-res-6-at.pdf [file 190385-res-6-at.pdf]

**Appendix 6 (as supplied by the authors): Schoenfeld residuals test of hazard proportionality in the Cox model predicting all-cause premature mortality**

|                                   | Pre-stratification | Post-stratification |
|-----------------------------------|--------------------|---------------------|
| Household food insecurity status: |                    |                     |
| Food secure                       | ref                | ref                 |
| Marginally food-insecure          | -0.0062 (0.32)     | -0.0080 (0.19)      |
| Moderately food-insecure          | -0.0004 (0.95)     | -0.0047 (0.44)      |
| Severely food-insecure            | -0.0052 (0.40)     | -0.0078 (0.19)      |
| Household income:                 |                    |                     |
| \$0-20 000                        | ref                | ref                 |
| \$20 001-40 000                   | -0.0086 (0.17)     | -0.0034 (0.57)      |
| \$40 001-60 000                   | -0.0041 (0.51)     | -0.0004 (0.95)      |
| \$60 001-80 000                   | -0.0042 (0.50)     | 0.0026 (0.67)       |
| \$80 001 and over                 | -0.0041 (0.49)     | 0.0031 (0.61)       |
| Missing from 2005-16              | 0.0133 (0.033)     | 0.0210 (0.0006)     |
| Missing from 2017                 | 0.0039 (0.53)      | 0.0010 (0.869)      |
| Housing tenure:                   |                    |                     |
| Renter                            | ref                | ref                 |
| Homeowner                         | 0.0250 (0.0001)    | 0.0090 (0.14)       |
| Missing                           | -0.0029 (0.64)     | 0.0013 (0.84)       |
| Highest education in household:   |                    |                     |
| High school incomplete            | 0.0045 (0.47)      | 0.0089 (0.149)      |
| High school graduate              | ref                | ref                 |
| Some college                      | 0.0029 (0.65)      | 0.0025 (0.69)       |
| College degree                    | 0.0052 (0.41)      | 0.0006 (0.92)       |
| Missing                           | -0.0053 (0.40)     | -0.0059 (0.34)      |
| Household type:                   |                    |                     |
| Married with children             | ref                | ref                 |
| Married without children          | 0.0346 (0.0000)    | 0.0087 (0.15)       |
| Lone parents                      | 0.0020 (0.75)      | 0.0047 (0.44)       |
| Individuals and other types       | 0.0262 (0.0000)    | 0.0102 (0.090)      |
| Missing                           | -0.0011 (0.86)     | -0.0015 (0.81)      |
| Smoker status:                    |                    |                     |
| Never smoked                      | ref                | ref                 |
| Former smoker                     | -0.0105 (0.086)    | -0.0186 (0.0025)    |
| Current smoker                    | 0.0079 (0.19)      | -0.0047 (0.44)      |
| Missing                           | -0.0097 (0.12)     | -0.0118 (0.056)     |
| Alcohol consumption last year:    |                    |                     |
| None                              | -0.0235 (0.0001)   | -0.0251 (0.0000)    |
| Up to once a week                 | ref                | ref                 |
| Twice a week up to once a day     | 0.0016 (0.80)      | -0.0024 (0.69)      |
| Missing                           | 0.0051 (0.42)      | 0.0051 (0.40)       |
| Female                            | 0.0296 (0.0000)    | stratified          |
| Age at interview                  | -0.0612 (0.0000)   | stratified          |
| Hospitalized last two years:      |                    |                     |
| No                                | ref                | ref                 |
| Yes                               | -0.0746 (0.0000)   | stratified          |
| Missing (Quebec)                  | -0.0184 (0.0030)   | stratified          |
| Number of chronic conditions:     |                    |                     |

Appendix to: Men F, Gundersen C, Urquia ML, et al. Association between household food insecurity and mortality in Canada: a population-based retrospective cohort study.

CMAJ 2020. doi: 10.1503/cmaj.190385. Copyright © 2020 The Author(s) or their employer(s).

To receive this resource in an accessible format, please contact us at cmajgroup@cmaj.ca.

|         |                  |            |
|---------|------------------|------------|
| None    | ref              | ref        |
| 1       | -0.0284 (0.0000) | stratified |
| 2       | -0.0124 (0.034)  | stratified |
| 3+      | -0.0282 (0.0000) | stratified |
| Missing | -0.0152 (0.015)  | stratified |

---

Note: Rho values for each independent variable were displayed alongside p-values (in parentheses) for chi-squared statistics. Respondent's sex, age at interview, hospitalization history in the past two years, and number of self-reported chronic conditions were set as strata in the post-stratification model, with no corresponding rho values.
